# Supplementary material
Source: HighWire-hosted journal article supplement (https://ebmtp.com/highwire/filestream/136124/field_highwire_adjunct_files/0/boyle_85_1930.pdf)
Supplement: boyle_85_1930.pdf [file boyle_85_1930.pdf]

# 社区老年人群的脑淀粉样血管病与认知结局

Patricia A. Boyle, PhD; Lei Yu, PhD; Sukriti Nag, MD, PhD; Sue Leurgans, PhD;

Robert S. Wilson, PhD; David A. Bennett, MD; Julie A. Schneider, MS, MD

**目的：**我们旨在验证老年人脑淀粉样血管病（cerebral amyloid angiopathy, CAA）与阿尔茨海默病（Alzheimer disease, AD）痴呆、多个认知系统功能降低具有相关性而与 AD 斑块、缠结病理学说和其他常见的年龄相关的神经病理学说无关的假说。

**方法：**1,113 例受试者来自于 2 项纵向老龄临床病理学研究：快速记忆与老龄化项目和宗教团体研究。所有受试者在死前平均 7.1 年内每年都进行临床评估，包括详细的认知功能测试。评估所有临床信息后（不知晓神经病理学信息）作出 AD 的临床诊断。采用神经病理学检查进行 CAA、AD 病理、大梗塞、微小梗塞以及新皮质 Lewy 小体的评估。应用 logistic 回归模型验证 CAA 与 AD 痴呆间的相关性，采用线性混合模型检测其与认知功能下降的相关性。

**结果：**CAA 非常常见，占受试者中的 78.9%，与 AD 病理型轻度相关（ $p = 0.401$ ,  $p < 0.0001$ ）。在对斑块、缠结和其他常见的年龄相关神经病理学因素的校正分析中 CAA 与 AD 痴呆发生几率增加有关（比值比 = 1.237, 95% 可信区间 1.082~1,414），并增加总体认知、感觉速度、情景记忆、语义记忆的下降几率。CAA 与认知结局的相关性并不是由所累及的毛细血管引起的。

**结论：**CAA 是老年人 AD 型痴呆和多个认知系统下降的重要决定性因素。 *Neurology*® 2015;85:1930–1936
